# Supplementary material for: Stable Fibroblast Growth Factor 2 Dimers with High Pro-Survival and Mitogenic Potential
Source: MDPI journal article supplement (doi:10.3390/ijms21114108), 2020-06-09
Supplement: s1 [file s1]

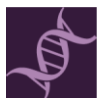

Supplementary Materials

## Stable Fibroblast Growth Factor 2 Dimers with High Pro-Survival and Mitogenic Potential

Daria Nawrocka <sup>1</sup>, Mateusz Adam Krzyscik <sup>1,2</sup>, Łukasz Opaliński <sup>1</sup>, Malgorzata Zakrzewska <sup>1</sup> and Jacek Otlewski <sup>1,\*</sup>

<sup>1</sup> Department of Protein Engineering, Faculty of Biotechnology, University of Wrocław, Joliot-Curie 14a, 50-383 Wrocław, Poland; daria.nawrocka@uwr.edu.pl (D.N.); mateusz.krzyscik@uwr.edu.pl (M.A.K.); lukasz.opalinski@uwr.edu.pl (Ł.O.); malgorzata.zakrzewska@uwr.edu.pl (M.Z.)

<sup>2</sup> Department of Protein Biotechnology, Faculty of Biotechnology, University of Wrocław, Joliot-Curie 14a, 50-383 Wrocław, Poland

\* Correspondence: jacek.otlewski@uwr.edu.pl; Tel.: +48-71-375-28-24

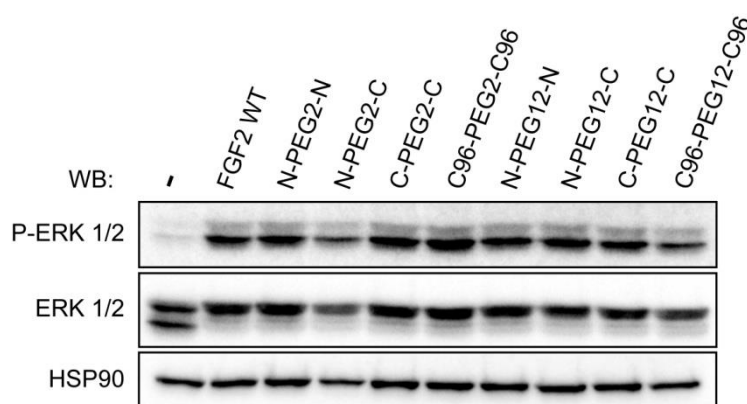

**Figure S1.** Activation of cellular signaling. Serum-starved U2OS-R1 cells were stimulated for 15 minutes with wild-type FGF2 (FGF2 WT) or dimers at 10 ng/mL concentration. Cells were lysed and activation of downstream signaling cascades was assessed with western blotting using the following antibodies: anti-phospho-ERK1/2 (P-ERK1/2), anti-ERK1/2 and anti-heat shock protein 90 (HSP90) as a loading control.

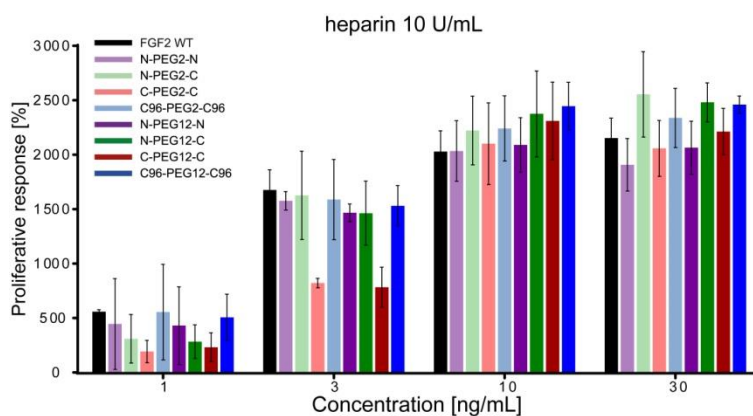

**Figure S2.** Biological activity of FGF2 dimers. Serum-starved NIH3T3 cells were treated with wild-type FGF2 (FGF2 WT) or dimers at various concentrations (1-30 ng/mL) in the presence of 10 U/mL heparin. After 72 h cell viability was measured using AlamarBlue Reagent. Percent

proliferative activity of NIH3T3 (mean  $\pm$  SD) was normalized to the blank media per treatment set. The average values and errors were calculated based on three independent experiments.

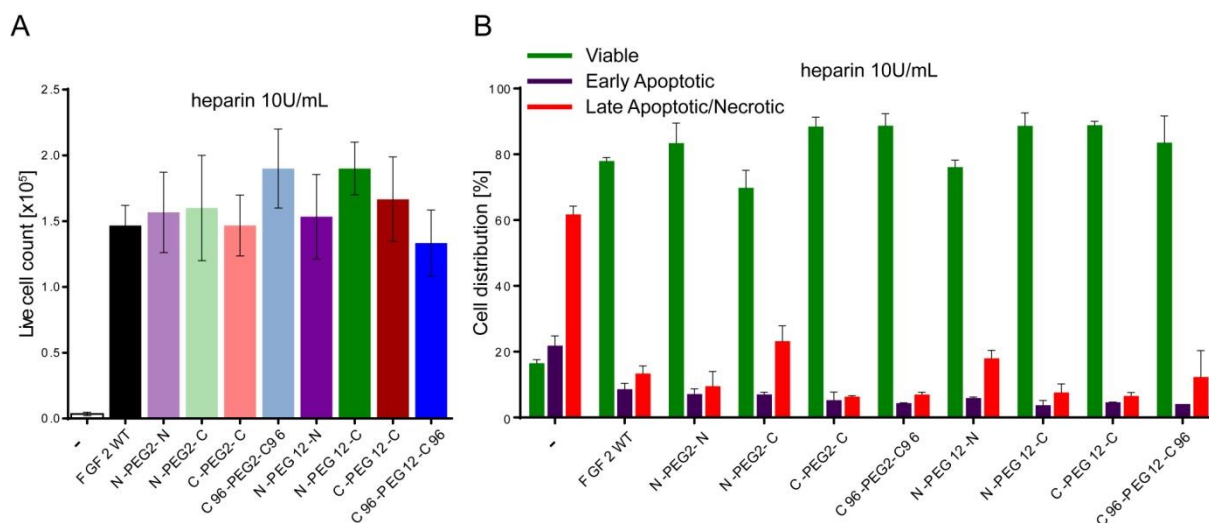

**Figure S3.** Pro-survival effect of FGF2 dimers on NIH3T3 cells. **(A)** Live cell counting performed with the use of hemocytometer and Trypan Blue staining after 72 h of culture with 10 ng/mL wild-type FGF2 (FGF2 WT) or dimers in the presence of 10 U/mL heparin. **(B)** Apoptosis assessed by Annexin V and propidium iodide (PI) assay. The data are mean values of three independent experiments  $\pm$  SD.

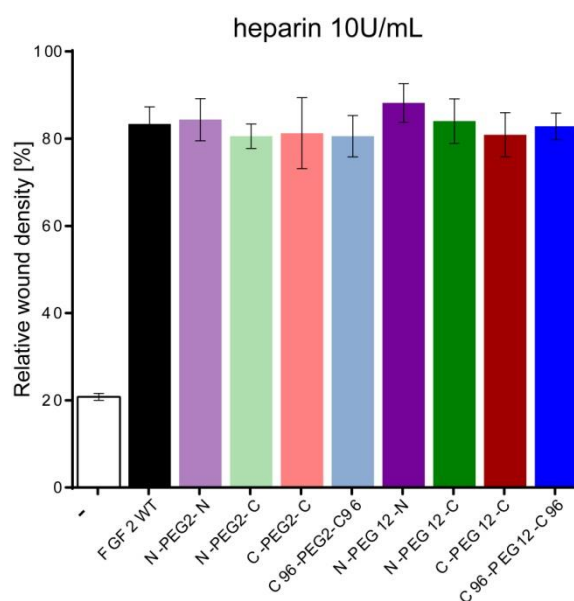

**Figure S4.** The effect of dimeric FGF2 variants on the migration of NIH3T3 cells. Serum-starved NIH3T3 cells were treated with FGF2 dimers (10 ng/mL) in the presence of 10 U/mL heparin. Relative wound density was calculated after 48 h of cell stimulation. Representative results of one of two independent experiments are shown. The mean values  $\pm$  SD were calculated based on four replicates.

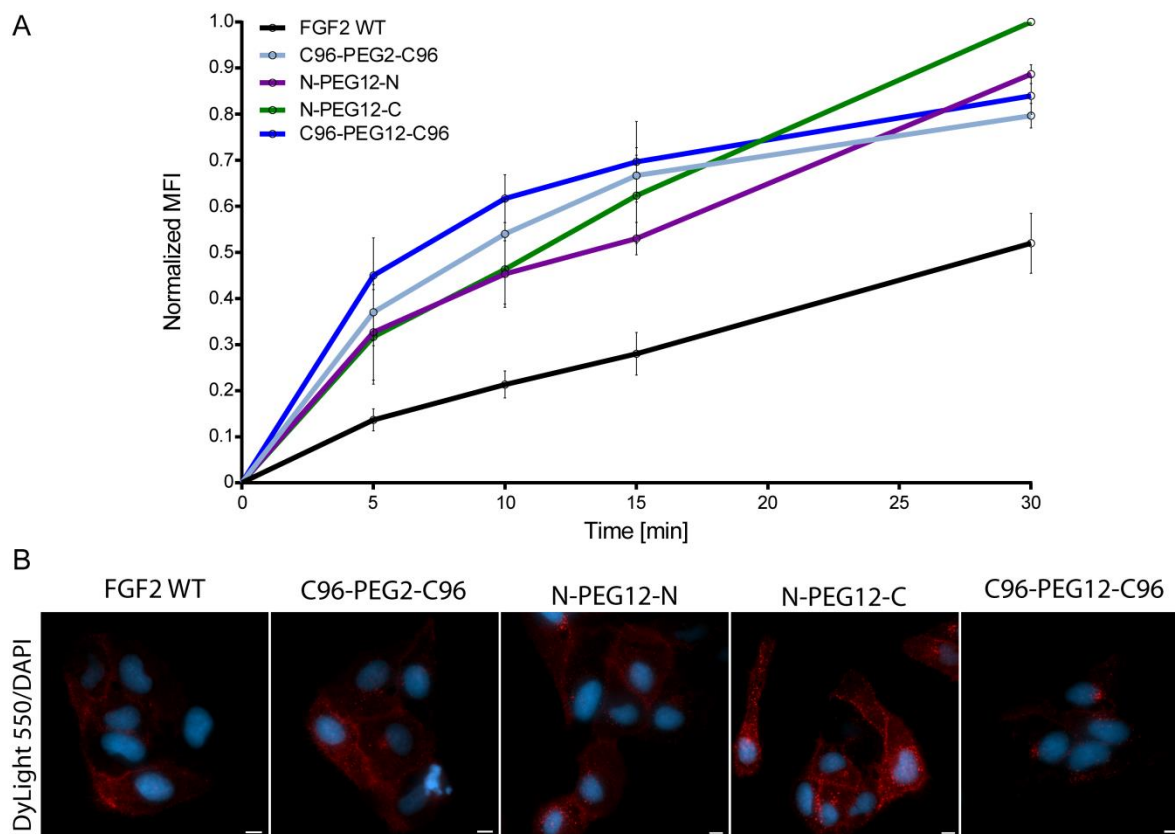

**Figure S5.** Internalization of FGF2 dimers. **(A)** Flow cytometric study of internalization kinetics. 100 ng/mL of Alexa Fluor 488-labeled proteins was added to cells, and the incubation was carried out for 5, 10, 15, or 30 minutes at 37 °C. Results represent the mean fluorescence intensities (MFI) normalized to untreated control cells under each experimental condition from three independent experiments. Values are the means for each data set  $\pm$  SD. **(B)** Serum-starved U2OS-R1 cells were pre-incubated with DyLight 550-labeled wild-type FGF2 or selected dimers (100 ng/mL) for 10 minutes on ice and then transferred to 37 °C for 15 minutes. Cells were subsequently fixed and nuclei were visualized with DAPI. Analysis was performed by fluorescence microscopy. Scale bars represent 10  $\mu$ m.

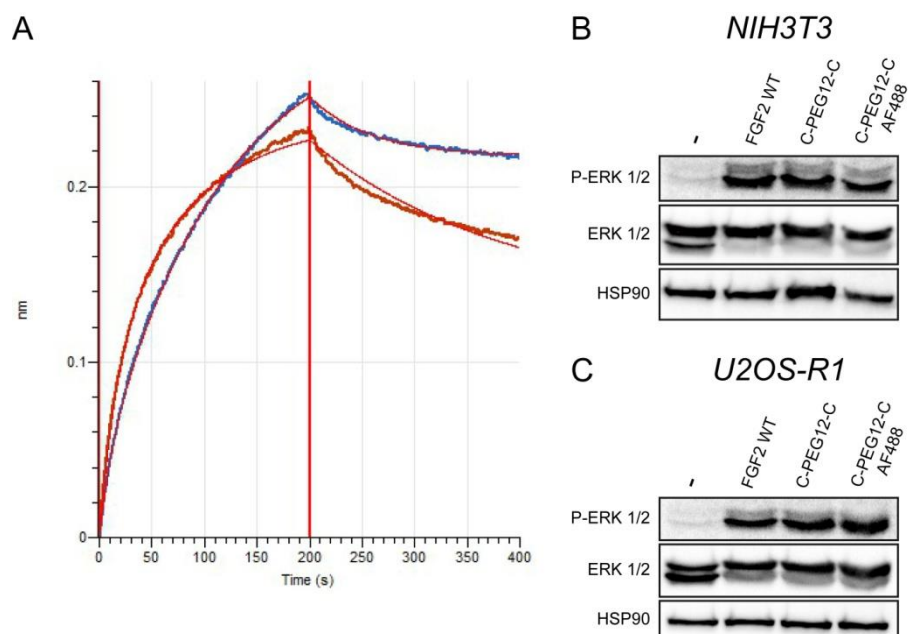

**Figure S6.** Binding properties and biological functionality of Alexa Fluor 488 (AF488)-labeled C-PEG12-C dimer. **(A)** Bio-layer interferometry (BLI) analysis of the interaction of AF-488-labeled and non-labeled C-PEG12-C dimer with FGFR1c. The solid lines represent local fits to the 1:1 interaction model. **(B,C)** Activation of ERKs cascades by AF-488 labeled and non-labeled C-PEG12-C dimer in NIH3T3 **(B)** and U2OS-R1 **(C)** cells assessed with western blotting.

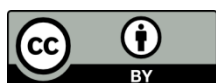

© 2020 by the authors. Submitted for possible open access publication under the terms and conditions of the Creative Commons Attribution (CC BY) license (<http://creativecommons.org/licenses/by/4.0/>).
